# Supplementary material for: A Major QTL Cluster of Weak-Gluten on Wheat Chromosome 2D informs Marker-Assisted Selection
Source: Research Square preprint supplement (doi:10.21203/rs.3.rs-8260532/v1), 2025-12-30
Supplement: Supplementary file 1 [file c28102c98330f203b091f904.xlsx]

## Sheet: Sheet1
Discovery of a Major QTL Cluster on Chromosome 2D Underlying Weak-Gluten Wheat Quality Traits and Development of Marker-Assisted Breeding Resources
Supplementary Table S1. Summary of 41 QTLs identified on the quality traits of the Taichung29/MM902 recombinant inbred line (RIL) populations examined in 2023.
Traita	QTL	Envb	Chr	LeftMarker	RightMarker	LODc	PVE(%)d	Add e
GPC	QGPCtm.swust-2DL	PD	2DL	AX-109785183	AX-110384776	4.74	13.46	0.33
	QGPCtm.swust-5DL	PD	5DL	AX-111670747	AX-108763694	2.58	7.22	-0.2
	QGPCtm.swust-7AL	QY	7AL	AX-109470371	AX-111157528	2.7	8.34	0.38
WGC	QWGCtm.swust-2DL	PD	2DL	AX-110072786	AX-111956072	8.91	23.13	1.43
	QWGCtm.swust-7DL	QY	7DL	AX-111473400	AX-109276227	3.68	11.1	1.63
GH	QGHtm.swust-1BS	XJ	1BS	AX-109913678	AX-110041309	3.69	3.95	-4.7
		QY	1BS	AX-109913678	AX-110041309	2.9	3.7	4.1
	QGHtm.swust-1DL	XJ	1DL	AX-111143912	AX-110771095	3.37	1.34	-5.91
	QGHtm.swust-2AL	XJ	2AL	AX-111570872	AX-110492596	4.01	0.16	-7.98
	QGHtm.swust-2BL	XJ	2BL	AX-111502586	AX-110928542	3.05	0.16	-5.81
		QY	2BL	AX-111502586	AX-110928542	2.83	3.3	4.47
	QGHtm.swust-5DL	XJ	5DL	AX-109459390	AX-111481379	2.77	0.15	-5.68
		QY	5DL	AX-109459390	AX-111481379	2.6	3.27	4.4
	QGHtm.swust-6AL	XJ	6AL	AX-108839851	AX-110469098	4	0.16	-8.1
	QGHtm.swust-6DL	XJ	6DL	AX-109035604	AX-109077353	3.56	0.15	-6.01
		QY	6DL	AX-109035604	AX-109077353	3	3.68	4.29
	QGHtm.swust-2DL	PD	2DL	AX-110072786	AX-111956072	13.65	29.7	3.38
		QY	2DL	AX-110072786	AX-111956072	3.62	1.02	1.71
	QGHtm.swust-4DL	PD	4DL	AX-109535753	AX-109444707	2.66	5.12	-1.41
	QGHtm.swust-3BL	QY	3BL	AX-109524255	AX-109385815	2.55	3.87	4.17
	QGHtm.swust-4AS	QY	4AS	AX-111092511	AX-110484132	2.87	3.54	4.31
	QGHtm.swust-7DL	QY	7DL	AX-110830564	AX-110888456	3.23	10.49	1.5
TW	QTWtm.swust-2AL.1	QY	2AL	AX-111499051	AX-111079731	5.61	2.84	29.25
	QTWtm.swust-2AL.2	QY	2AL	AX-111570872	AX-110492596	5.64	2.85	28.68
	QTWtm.swust-2DS.1	QY	2DS	AX-109368600	AX-109356565	3.7	1.68	25.27
	QTWtm.swust-2DS.2	QY	2DS	AX-109356565	AX-94631361	3.61	1.67	29.01
	QTWtm.swust-3DL.1	QY	3DL	AX-110992096	AX-110923174	3.64	0.44	29.02
	QTWtm.swust-3DL.2	QY	3DL	AX-110824826	AX-110580157	5.7	0.45	30.39
	QTWtm.swust-4AS	PD	4AS	AX-111272311	AX-110541026	2.71	4.11	19.64
		QY	4AS	AX-111272311	AX-110541026	5.48	0.45	29.72
	QTWtm.swust-4DL.1	XJ	4DL	AX-110912249	AX-110832233	3.5	10.58	20.23
	QTWtm.swust-4DL.2	QY	4DS	AX-169335100	AX-109418321	4.79	0.98	24.2
	QTWtm.swust-5BS	QY	5BS	AX-94592812	AX-109986419	5.46	0.45	29.57
	QTWtm.swust-5DL.1	QY	5DL	AX-109459390	AX-111481379	3.84	0.44	23.28
	QTWtm.swust-5DL.2	QY	5DL	AX-111481379	AX-109450135	4.37	3.82	26.51
	QTWtm.swust-6AL.1	QY	6AL	AX-111066905	AX-108891954	5.4	0.46	29.24
	QTWtm.swust-6AL.2	QY	6AL	AX-108891954	AX-110469098	5.05	0.46	28.51
	QTWtm.swust-6DL.1	QY	6DL	AX-94797893	AX-110532674	3.6	2.69	29.01
	QTWtm.swust-6DL.2	PD	6DL	AX-89564650	AX-89535748	3.19	9.89	5.71
	QTWtm.swust-7DS.1	QY	7DS	AX-109824545	AX-111111002	2.85	3.16	17.46
	QTWtm.swust-7DS.2	QY	7DS	AX-111111002	AX-94690555	3.18	3.11	17.78
ZSV	QZStm.swust-1DL	PD	1DL	AX-111143912	AX-110771095	2.86	4.79	1.45
	QZStm.swust-2DL	PD	2DL	AX-111956072	AX-111707760	10.91	30.28	3.61
		QY	2DL	AX-111956072	AX-111707760	3.85	11.66	2.42
	QZStm.swust-4DS	QY	4DS	AX-109933613	AX-110984743	2.86	6.8	1.77
	QZStm.swust-5AL	PD	5AL	AX-109490163	AX-111616054	3.49	6.07	-1.62
	QZStm.swust-6AL	PD	6AL	AX-109041968	AX-111585865	4.11	7.37	1.79
		QY	6AL	AX-109041968	AX-111585865	4.11	7.37	1.79
	QZStm.swust-7AS	QY	7AL	AX-109456539	AX-111555543	3.61	8.73	1.98
a Grain protein content (GPC, %); Wet gluten content, (WGC, %); Test Weight (TW, g/L); Grain Hardness (GH); Zeleny Sedimentation Value (ZSV, mL). b PD, Pidu District; XJ, Xiaojian Town; QY, Qingyi Town.. c LOD, logarithm of odds score. d PVE, percentage of the phenotypic variance explained by the individual QTLs. e Add, additive effect ofthe grain yield allele.
